# Supplementary material for: Investigation of Newly Synthesized Bis-Acyl-Thiourea Derivatives of 4-Nitrobenzene-1,2-Diamine for Their DNA Binding, Urease Inhibition, and Anti-Brain-Tumor Activities
Source: Molecules. 2023 Mar 16;28(6):2707. doi: 10.3390/molecules28062707 (PMC10051851; doi:10.3390/molecules28062707)
Supplement: Supplementary file 1 [file molecules-28-02707-s001.zip › molecules-2248173-supplementary.pdf]

## Supplementary data

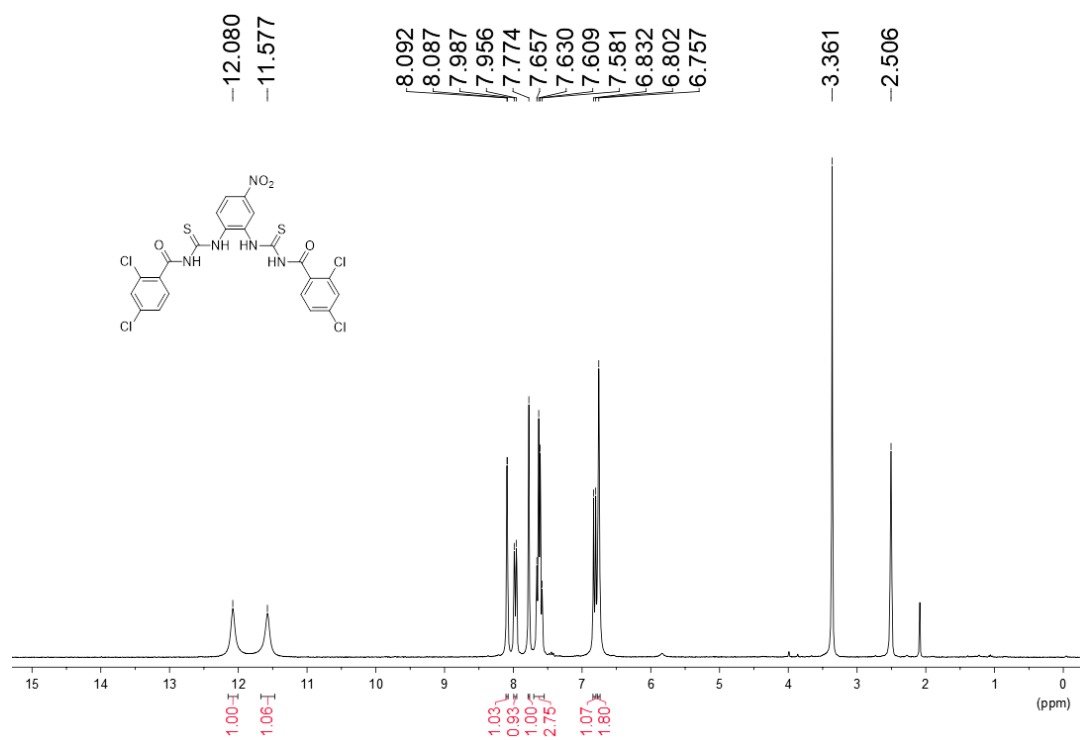

**Figure S1.** <sup>1</sup>H-NMR of UP-1.

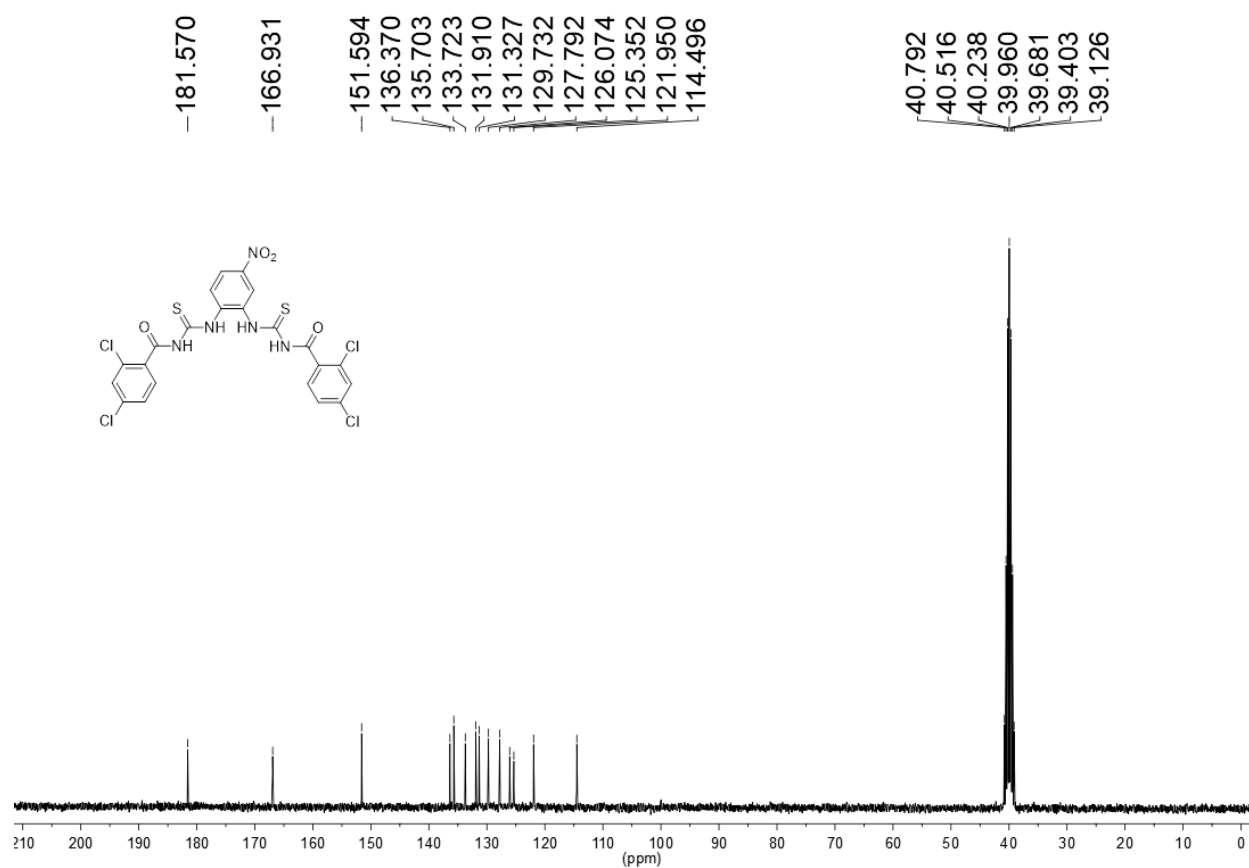

**Figure S2.**  $^{13}\text{C}$ -NMR of UP-1.

## FT-IR of UP-1

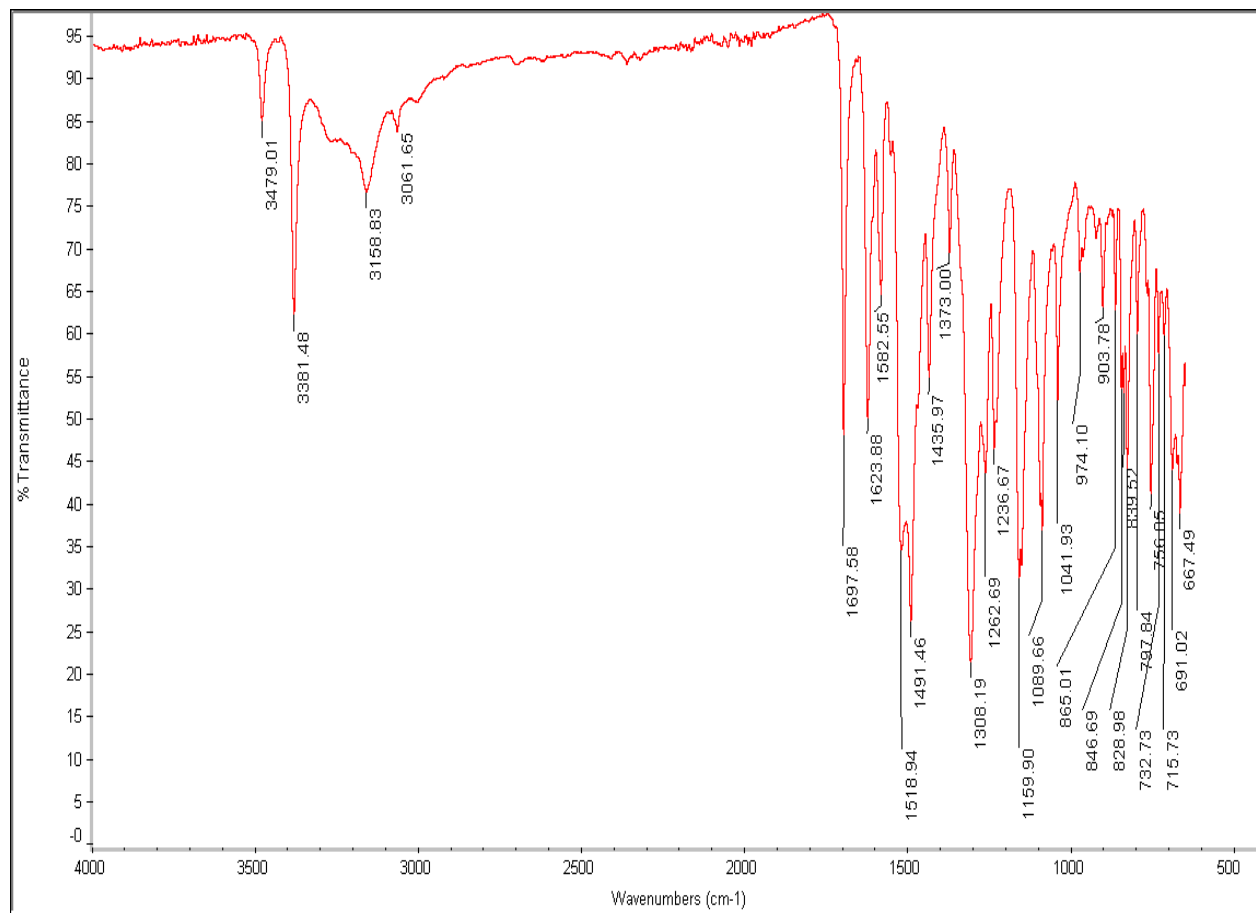

**Figure S3.** FT-IR of UP-1.

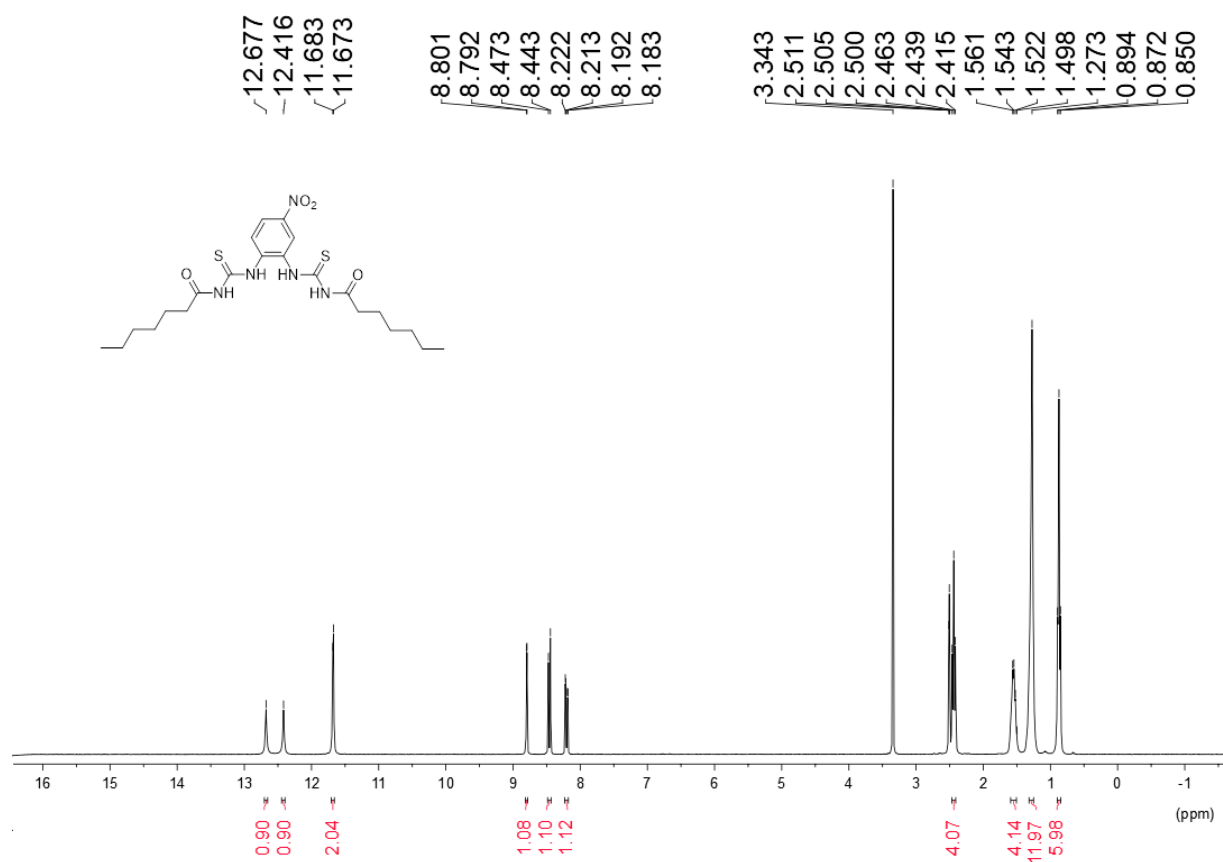

**Figure S4.**  $^1\text{H}$  NMR for UP-2.

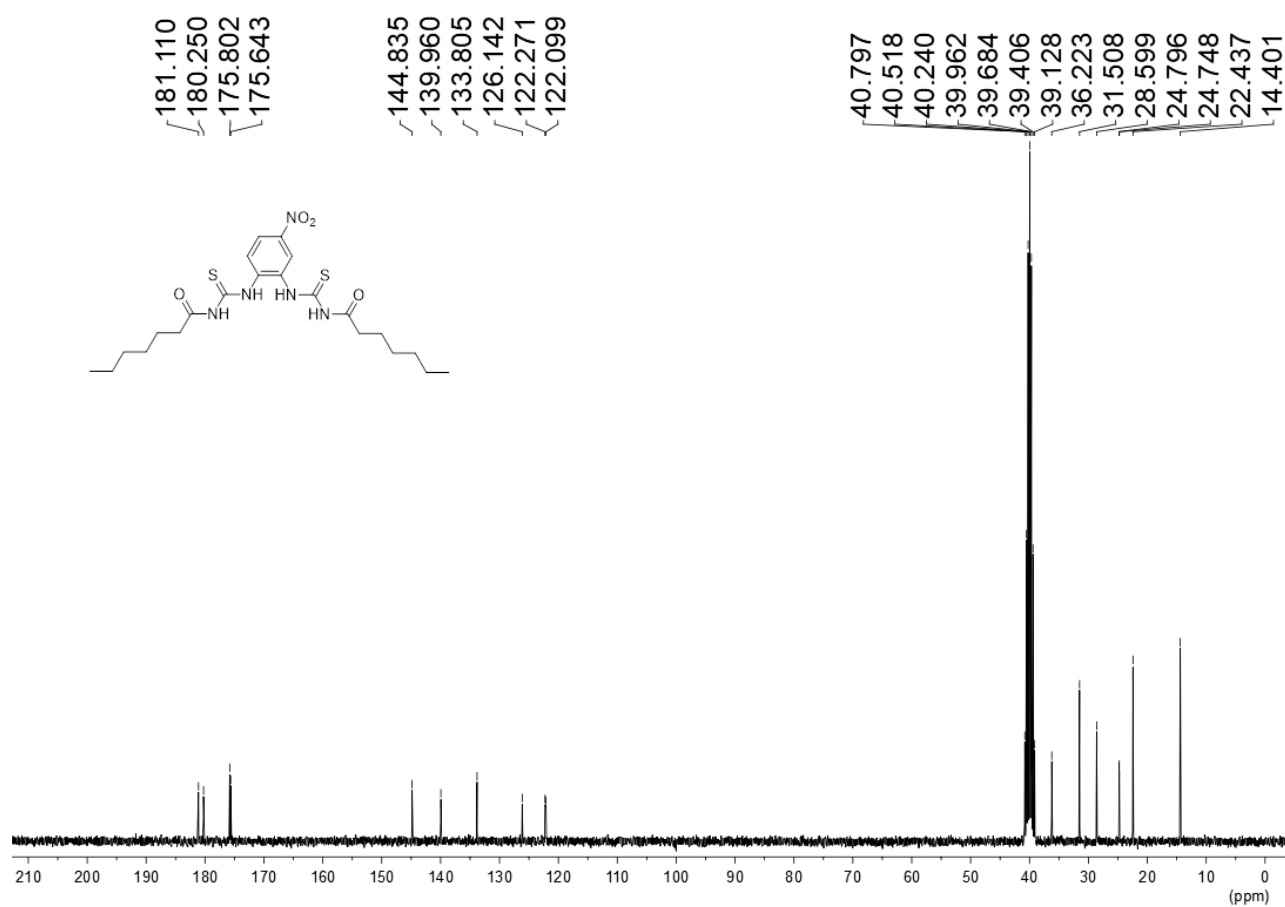

**Figure S5.**  $^{13}\text{C}$  NMR for UP-2.

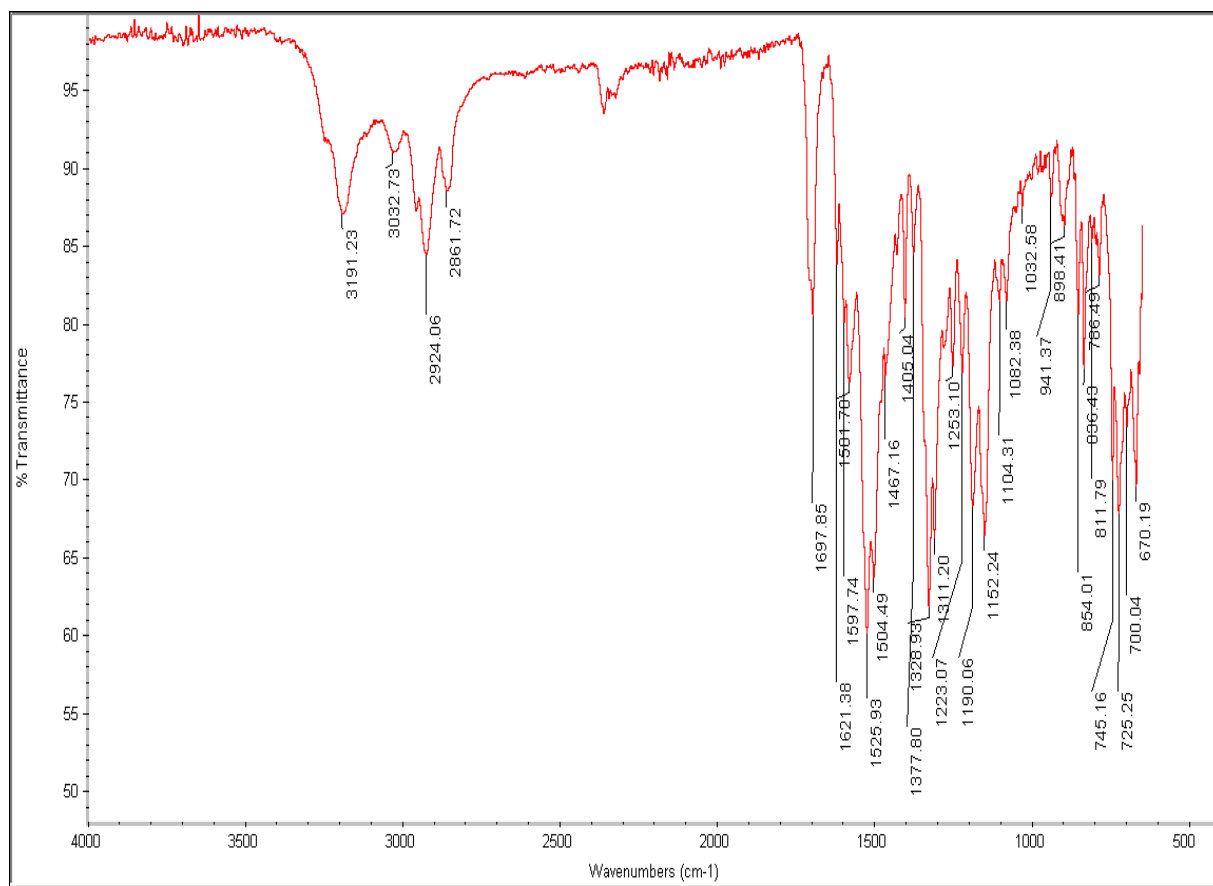

**Figure S6.** FT-IR of UP-2.

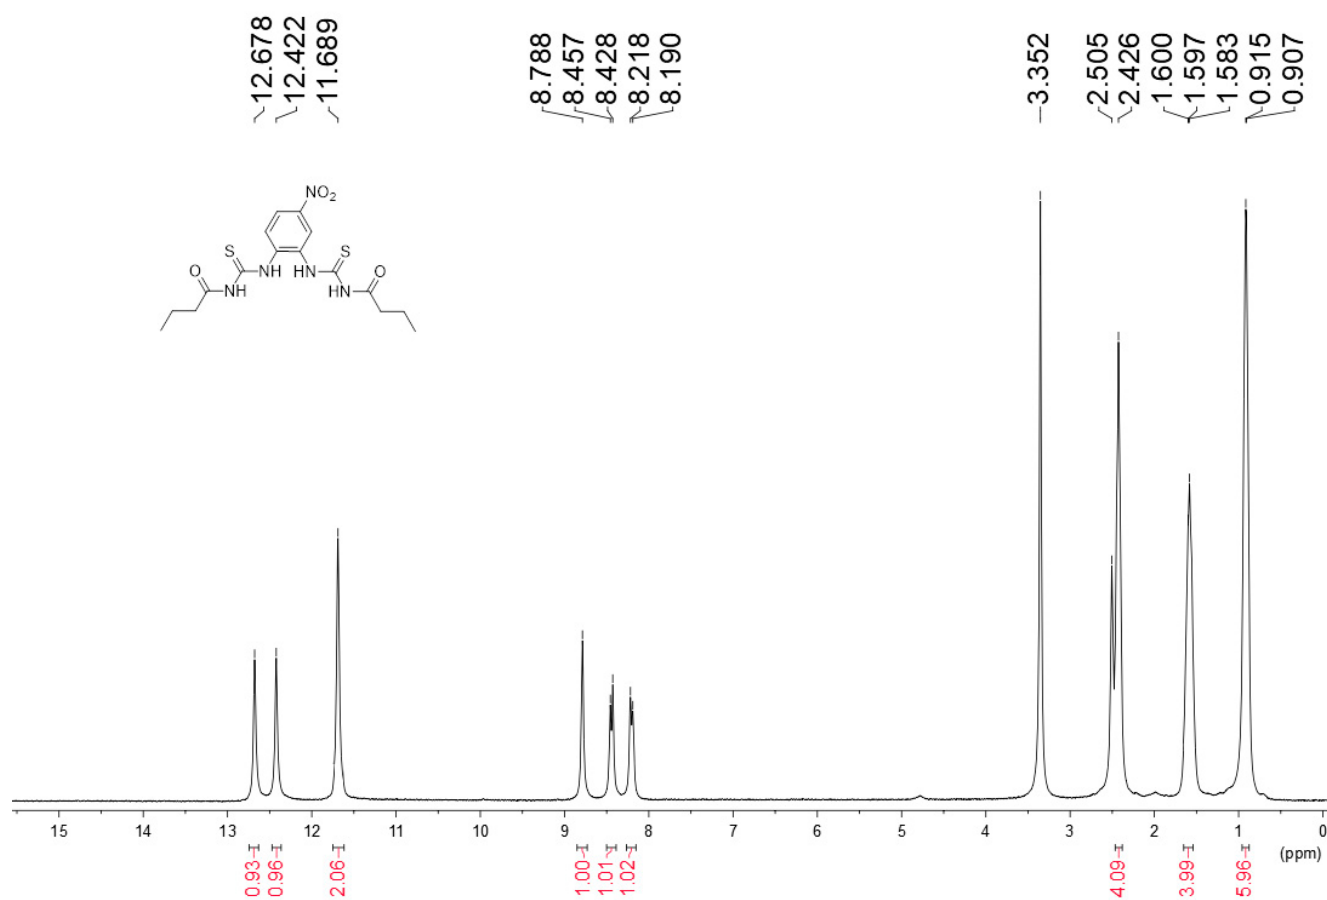

**Figure S7.**  $^1\text{H}$  NMR for UP-3.

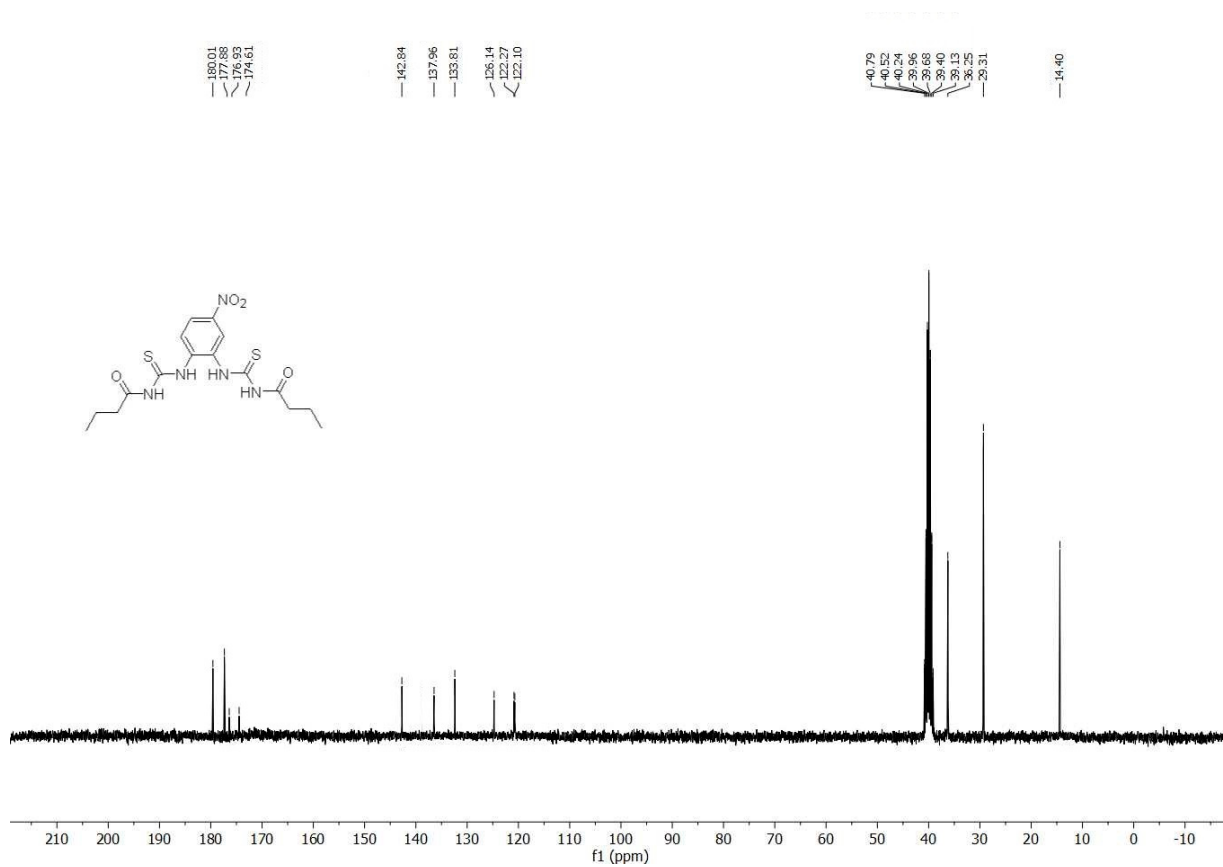

**Figure S8.**  $^{13}\text{C}$  NMR for UP-3.

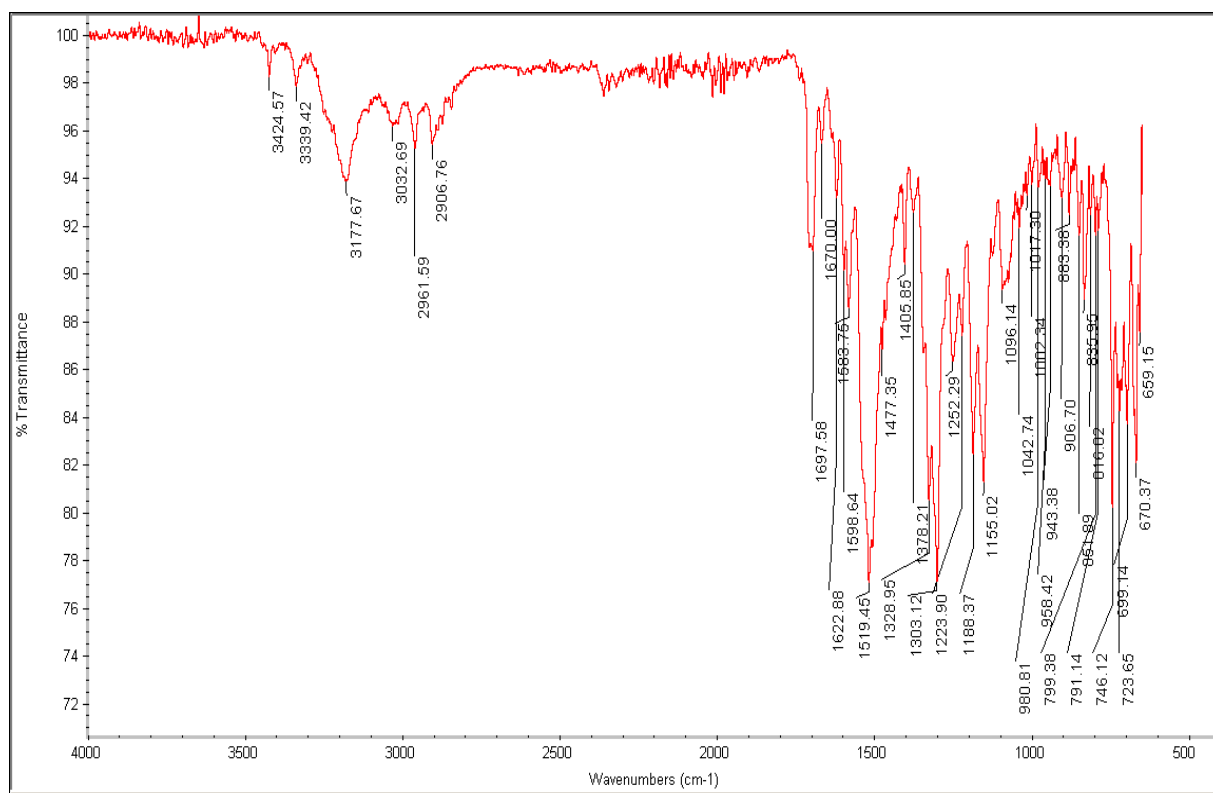

**Figure S9.** FTIR for UP-3.

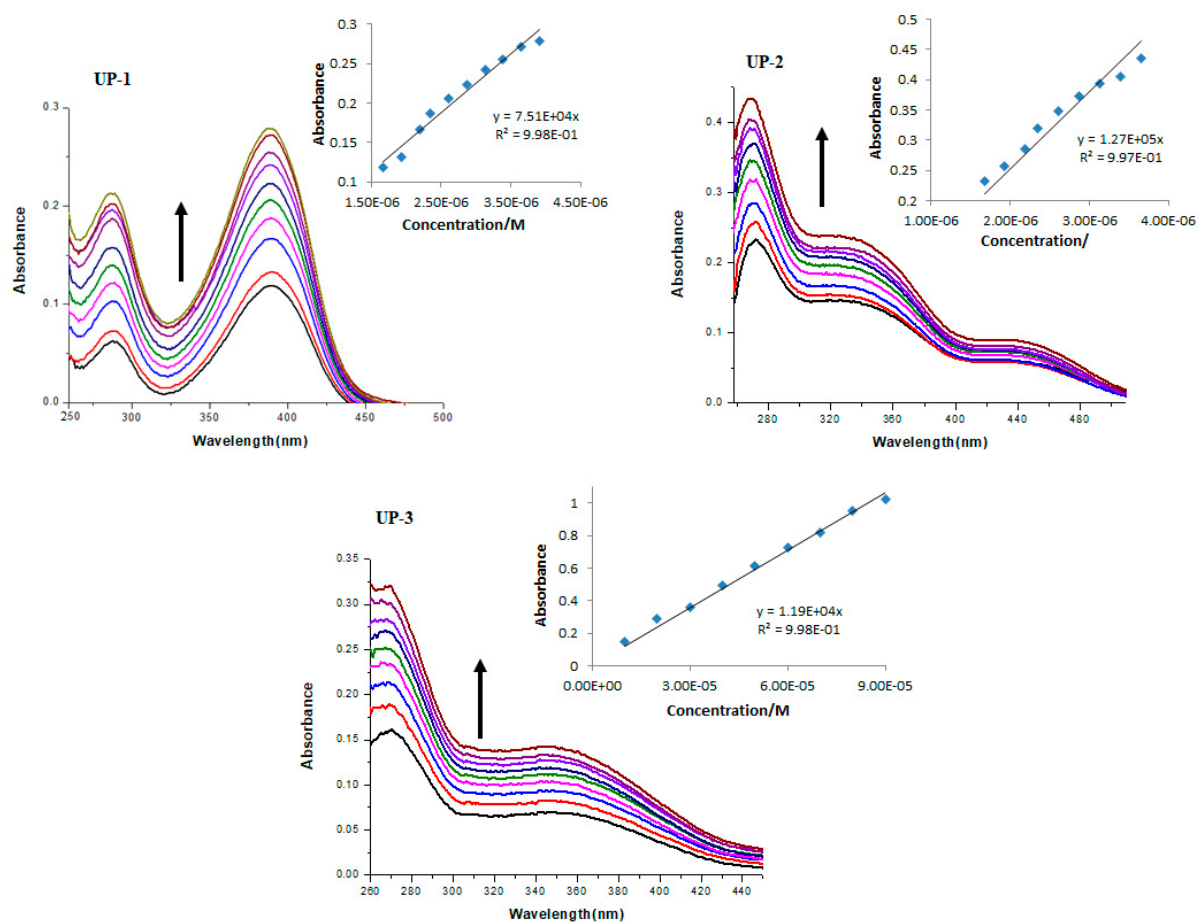

**Figure S10.** Concentration profile of the compounds, inset: Absorbance vs. Concentration graphs for the determination of molar extinction co-efficient.

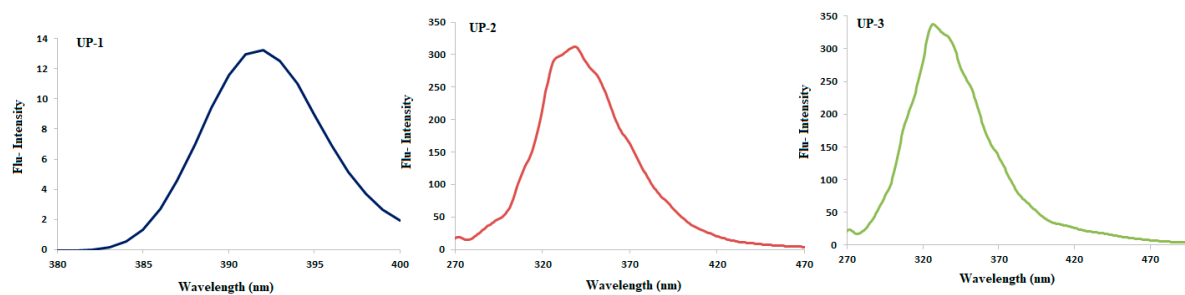

**Figure S11.** Fluorescence spectrum of compounds UP-1, UP-2 and UP-3.

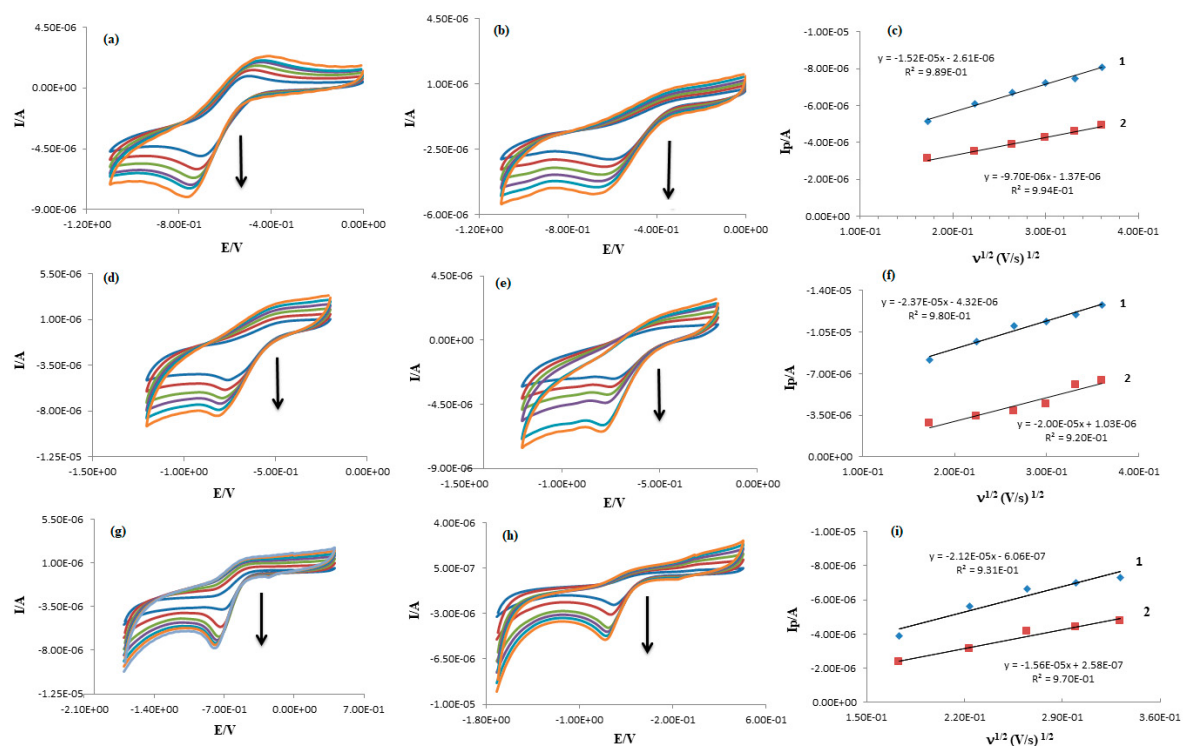

**Figure S12.** Cyclic voltammetric responses of UP-1, UP-2, and UP-3 without (a,d,g) and with (b,e,h) DNA (60 $\mu$ M) at various scan rates (0.03 - 0.13 V/s), (c,f,i) represents the graphs of  $I_p$  vs  $v^{1/2}$  for the compounds before (1) and after (2) DNA.

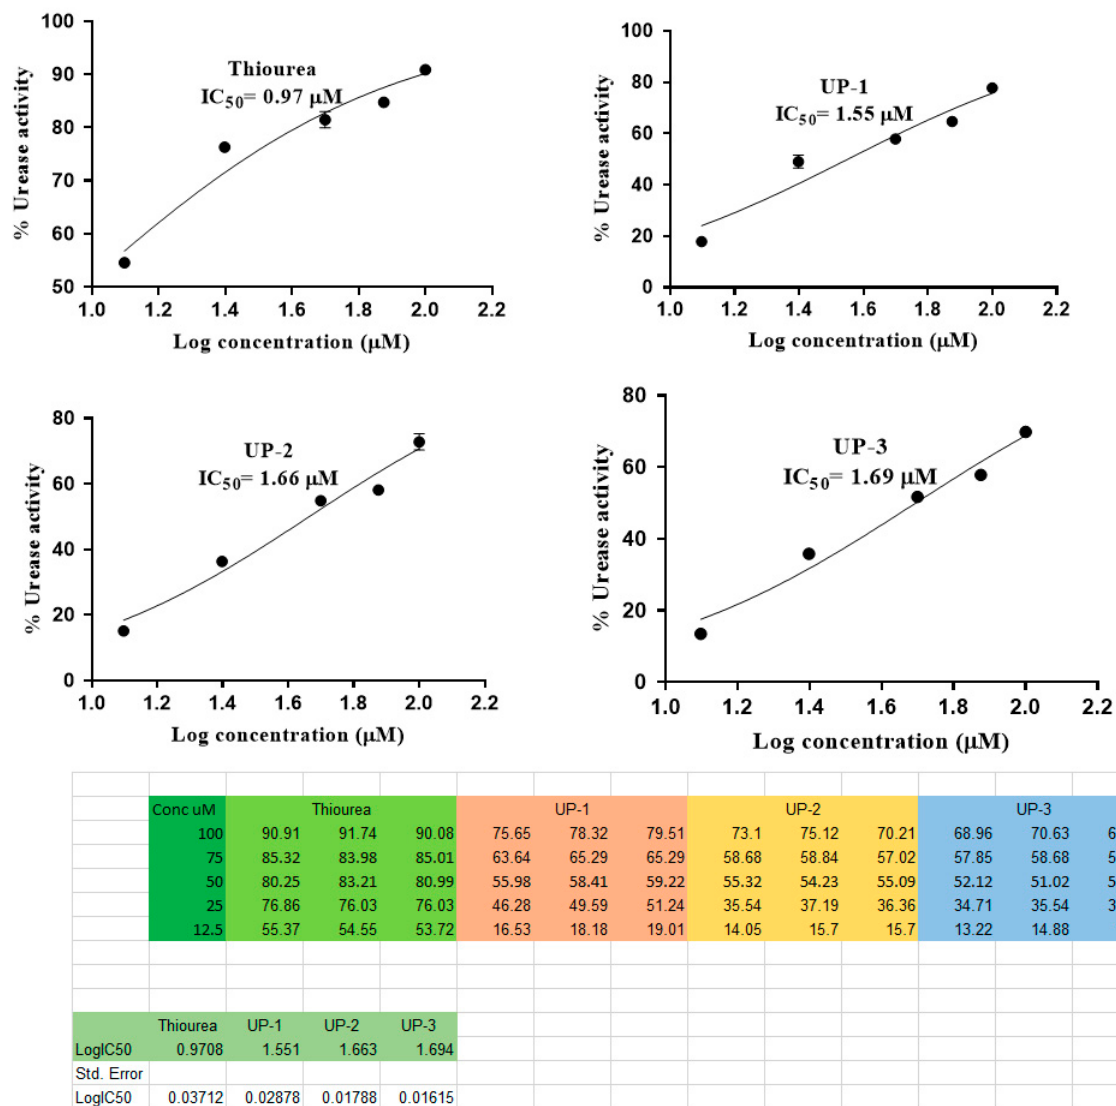

**Figure S13.** Graphs for the determination of IC<sub>50</sub> values of control and investigated compounds.

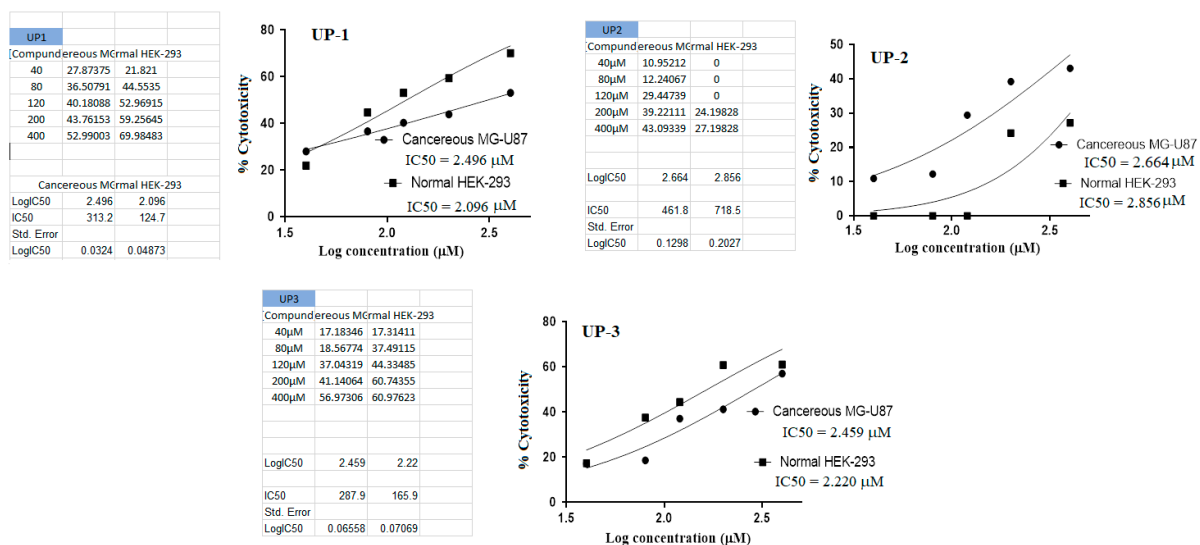

**Figure S14.** Graphs for the determination of IC<sub>50</sub> values of investigated compounds against cancerous (MG-U87) and normal (HEK-293) cell lines.
